# Supplementary material for: Two-Thirds of Seniors Like Using a Wellness App
Source: Preprints.org preprint supplement (doi:10.20944/preprints201808.0207.v1), 2018-08-10
Supplement: Supplementary file 1 [file supplementary]

# SUPPLEMENTAL FIGURES

**Wellzesta Life 2 Opinion Survey**

Dear resident, we are interested in our opinion. Thank you for taking the time to answer four questions.

In each image, a YELLOW ARROW marks the region of interest.

\* Required

On the events calendar, how would you like to select the day? \*

**(A)**

**(B)**

A. Using the way I always have (left image).

B. Using a calendar style (right image).

What was your experience with Wellzesta Life version 1? \*

1 2 3 4 5 6 7 8 9 10

Strongly dislike           Strongly enjoy

What is your experience with Wellzesta Life version 2? \*

1 2 3 4 5 6 7 8 9 10

Strongly dislike           Strongly enjoy

**SUBMIT** Page 1 of 1

This form was created inside of Wellzesta, Inc. - Report Abuse - Terms of Service - Additional Terms

Google Forms

FIGURE S1

Figure S1. Screenshots showing the survey.
